# Supplementary material
Source: Springer Nature journal article supplement (https://mijn.bsl.nl/resource/supplementary/13047_2011_460_MOESM2_ESM.pdf/7111726)

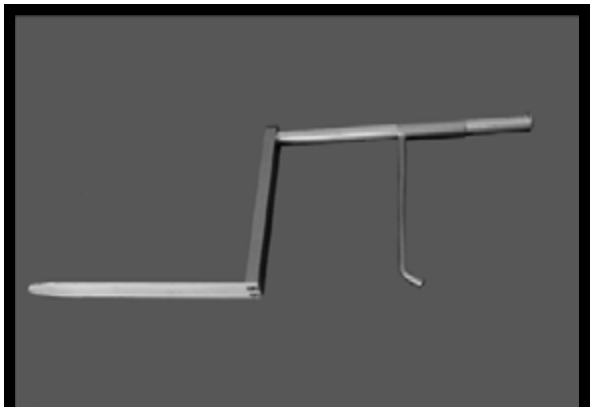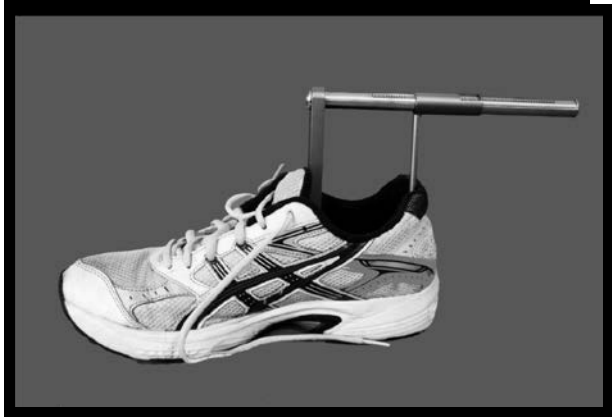

Supplement: MOESM2 [file 7111726]
